# Supplementary material
Source: Springer Nature journal article supplement (https://www.springermedizin.de/resource/supplementary/12955_2011_871_MOESM1_ESM.pdf/9561518)
Supplement: MOESM1 [file 9561518]

### General Coping

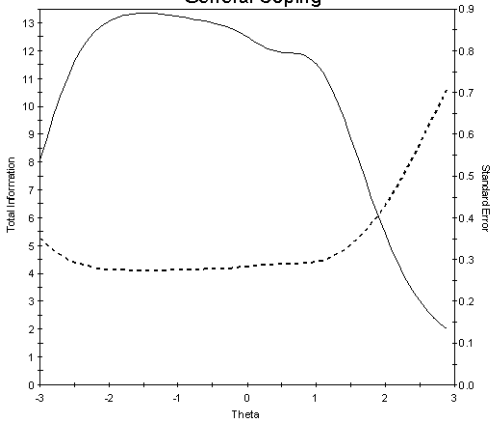

— Total Information    - - - Standard Error

### Interpersonal Skills

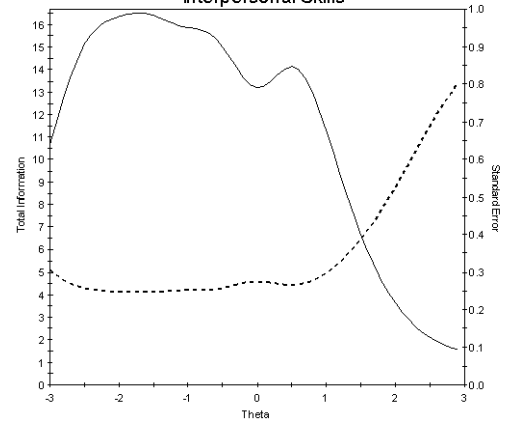

— Total Information    - - - Standard Error

### Autonomy and Personal Growth

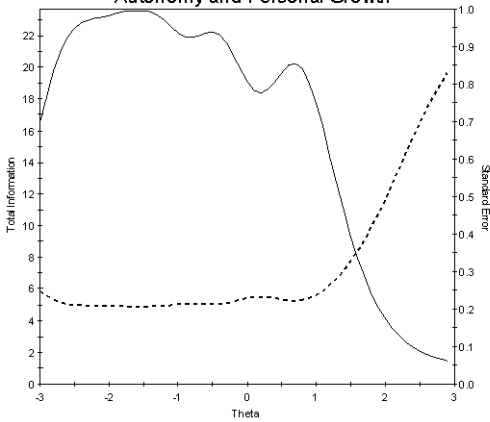

— Total Information    - - - Standard Error

### Emotional Support

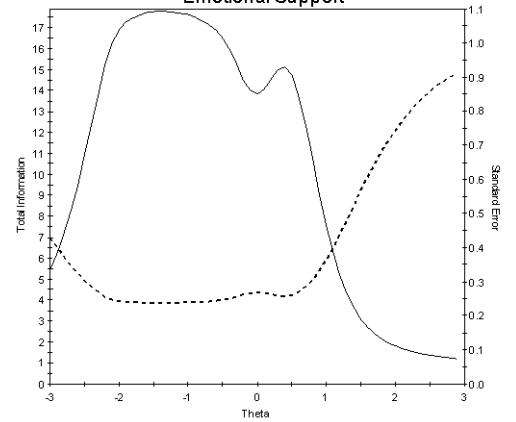

— Total Information    - - - Standard Error

### Spirituality

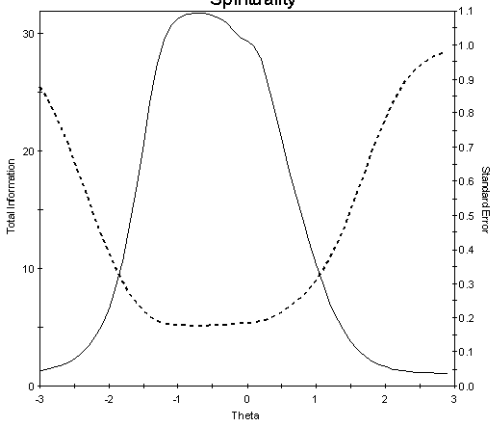

— Total Information    - - - Standard Error

### Global Affect

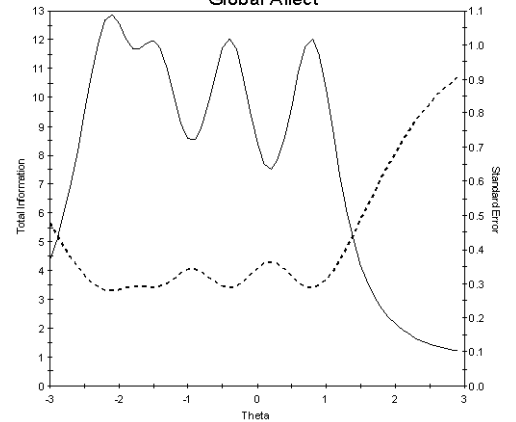

— Total Information    - - - Standard Error
